# Supplementary material
Source: MDPI journal article supplement (https://www.mdpi.com/2079-6412/12/12/1983)
Supplement: s1 [file s1]

## Supporting Information

### Buckling behavior of few-layer graphene on soft substrate

Yancheng Meng\*, Baowen Li, Luxian Li, and Jianqiang Zhang

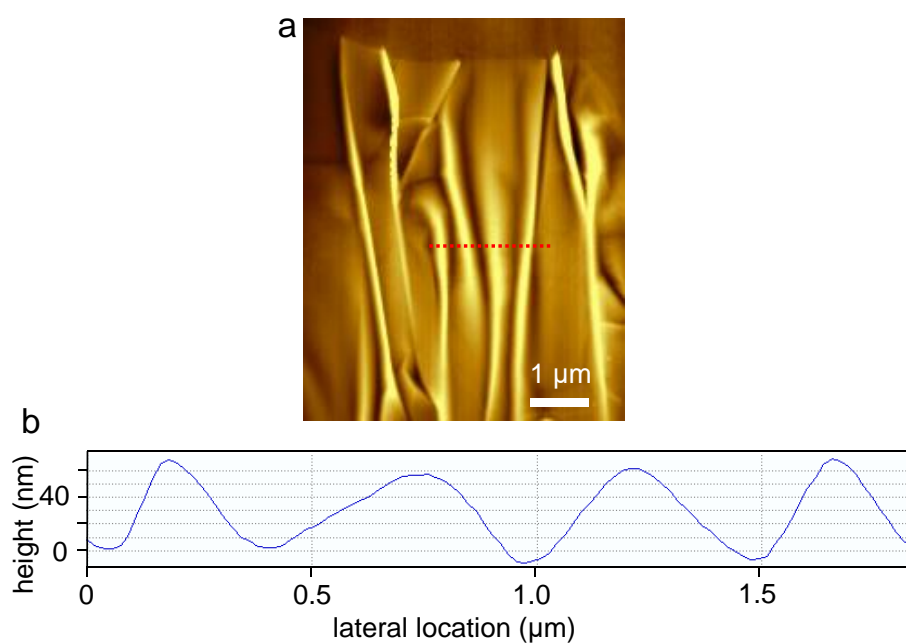

**Figure S1.** Buckling behavior of four-layer graphene. (a) Atomic force microscope (AFM) image, showing buckling behavior of four-layer graphene on PDMS film under 10% stretching. (b) Lateral line cut profiles of the buckling behavior in a, the location marked by red dotted line.
